# Supplementary material for: Impact of climate and host availability on future distribution of Colorado potato beetle
Source: PubMed Central journal article supplement (PMC5495769; doi:10.1038/s41598-017-04607-7), 2017-07-03
Supplement: 41598_2017_4607_MOESM1_ESM.pdf [file 41598_2017_4607_MOESM1_ESM.pdf]

1 **Impact of climate and host availability on future distribution of Colorado potato**  
2 **beetle**

3 CongWang<sup>1, 2</sup>, David Hawthorne<sup>3</sup>, Yujia Qin<sup>1</sup>, Xubin Pan<sup>2\*</sup>, Zhihong Li<sup>1\*</sup>, Shuifang  
4 Zhu<sup>2\*</sup>

5 1. College of Plant Protection, China Agricultural University, Beijing 100193, China

6 2. Institute of Plant Quarantine, Chinese Academy of Inspection and Quarantine,  
7 Beijing 100029, China

8 3. Department of Entomology, University of Maryland, 4112 Plant Science Building,  
9 College Park, Maryland 20742, USA

10 \* Correspondence and request for materials should be addressed to:

11 X.P. (xubin.hu.pan@gmail.com) or Z.L. ([lizh@cau.edu.cn](mailto:lizh@cau.edu.cn)) or S.Z. (zhusf@caiq.gov.cn)

12 China Agricultural University and Chinese Academy of Inspection and Quarantine  
13 have contributed equally to this work.

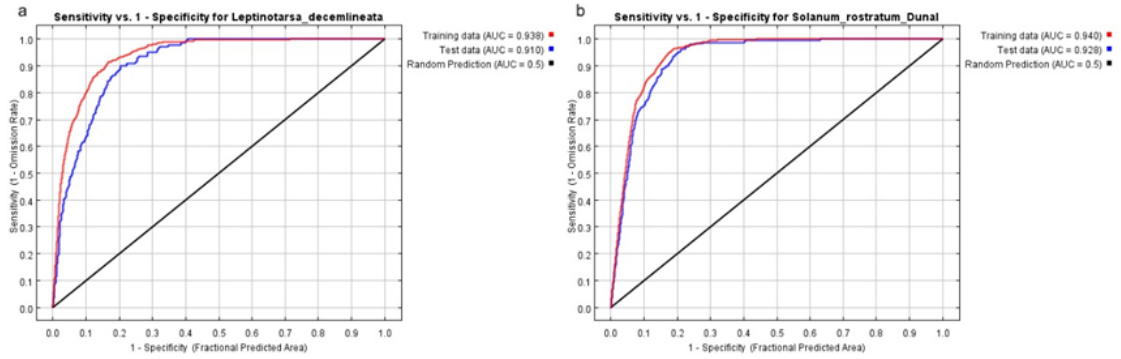

**Supplement Figure 1. The receiver operating characteristics curve (ROC) for training data of both species with the area under the ROC curve (AUC).** (a) ROC and AUC of Colorado potato beetle; (b) ROC and AUC of *Solanum rostratum* Dunal. These pictures were produced by Maxent (v3.3.3k, [http://biodiversityinformatics.amnh.org/open\\_source/maxent/](http://biodiversityinformatics.amnh.org/open_source/maxent/)).

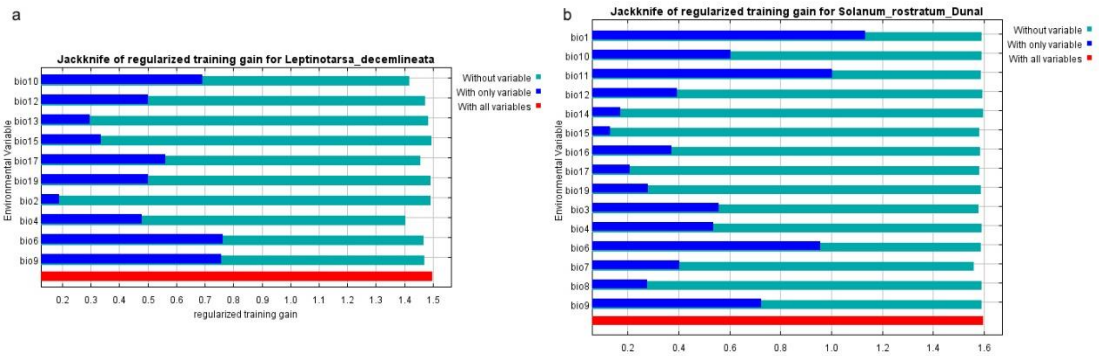

**Supplement Figure 2. Jackknife test for relative importance of environmental variables in the development of MaxEnt models.** (a) results of 10 environmental variables for Colorado potato beetle; (b) results of 15 environmental variables for *Solanum rostratum* Dunal. These pictures were produced by Maxent (v3.3.3k, [http://biodiversityinformatics.amnh.org/open\\_source/maxent/](http://biodiversityinformatics.amnh.org/open_source/maxent/)).
